# Supplementary material for: Statistical Approach to Incorporating Experimental Variability into a Mathematical Model of the Voltage-Gated Na+ Channel and Human Atrial Action Potential
Source: Cells. 2021 Jun 16;10(6):1516. doi: 10.3390/cells10061516 (PMC8234464; doi:10.3390/cells10061516)
Supplement: Supplementary file 1 [file cells-10-01516-s001.zip › table S1.xlsx]

## Sheet: iv_curve
pmid	name	[Na]o (mM)	[Na]I (mM)	temp ( C )	current units	pH o	pH i	drug	drug conc	holding potential (mV)	duration (ms)	potential 1 (mV)	capacitance (pF)	Notes	Sim Group
12890054_3	Dataset C Control	27	10	21	mV x pA/pF	7.4	7.2			-100	20	x			iv curve
12890054_3	Dataset D Control	27	10	21	mV x pA/pF	7.4	7.2			-100	20	x			iv curve
12890054_5	Dataset C Control	27	10	21	mV x pA/pF	7.4	7.2			-100	20	x			iv curve
12890054_5	Dataset D Control	27	10	21	mV x pA/pF	7.4	7.2			-100	20	x			iv curve
21647304_1	Dataset B Adults	25	5	18	mV x pA/pF	7.4	7.2			-80	100	x			iv curve
21647304_1	Dataset B Pediatrics	25	5	18	mV x pA/pF	7.4	7.2			-80	100	x			iv curve
23341576_2	Dataset C Control	8	5	24	mV x pA/pF	7.4	7.4			-110	30	x			iv curve
23341576_2	Dataset D Control	5	5	24	mV x pA/pF	7.4	7.4			-110	30	x		AF	iv curve
8928874_7	Dataset C day 1	5	5	17	mV x pA/pF	7.3	7.3			-140	20	x			iv curve
8928874_7	Dataset C day 3	5	5	17	mV x pA/pF	7.3	7.3			-140	20	x			iv curve
8928874_7	Dataset C day 5	5	5	17	mV x pA/pF	7.3	7.3			-140	20	x			iv curve
8928874_7	Dataset C fresh	5	5	17	mV x pA/pF	7.3	7.3			-140	20	x			iv curve
1323431_1	Dataset B	5	5	17	mV x nA	7.4	7.2			-140	20	x	126.8		normalized iv curve
1323431_3	Dataset A 2	2	5	17	mV x nA	7.4	7.2			-140	20	x	126.8		normalized iv curve
1323431_3	Dataset A 20	20	5	17	mV x nA	7.4	7.2			-140	20	x	126.8		normalized iv curve
1323431_3	Dataset A 5	5	5	17	mV x nA	7.4	7.2			-140	20	x	126.8		normalized iv curve
1323431_4	Dataset B Control	5	5	17	mV x nA	7.4	7.2			-140	20	x	126.8		normalized iv curve
7971163_1	Dataset	120	70	24	mV x nA	7.4	7.4			-135	12	x	100		normalized iv curve

## Sheet: gating
pmid	name	[Na]o (mM)	[Na]I (mM)	[Ca]o (mM)	[Ca]I (mM)	[K]o (mM)	[K]I (mM)	temp ( C )	current units	pH o	pH i	drug	drug conc	holding potential (mV)	duration (ms)	potential 1 (mV)	IPI (ms)	duration 2 (ms)	potential 2 (mV)	Y	Notes	IPI 2 (ms)	duration 3 (ms)	potential 3 (mV)	Sim Group
1323431_2	Dataset	5	5					17		7.4	7.2			-140	10	x				Ina Normalized to driving force					activation normalized to driving force
21647304_3	Dataset A Adults	25	5					18		7.4	7.2			-100	10	x				G normalized to G at 30					activation normalized to driving force
21647304_3	Dataset A Pediatrics	25	5					18		7.4	7.2			-100	10	x				G normalized to G at 30					activation normalized to driving force
8928874_7	Dataset D day 1	10	10					17		7.3	7.3			-140	20	x				I normalized to ?					activation normalized to driving force
8928874_7	Dataset D day 3	10	10					17		7.3	7.3			-140	20	x				I normalized to ?					activation normalized to driving force
8928874_7	Dataset D day 5	10	10					17		7.3	7.3			-140	20	x				I normalized to ?					activation normalized to driving force
8928874_7	Dataset D fresh	10	10					17		7.3	7.3			-140	20	x				I normalized to ?					activation normalized to driving force
1323431_8	Dataset A -100	5	5					17		7.4	7.2			-100	1000	-20	x	10	-20	Ina_2/Ina_1					I2/I1 Recovery
1323431_8	Dataset A -120	5	5					17		7.4	7.2			-120	1000	-20	x	10	-20	Ina_2/Ina_1					I2/I1 Recovery
1323431_8	Dataset A -140	5	5					17		7.4	7.2			-140	1000	-20	x	10	-20	Ina_2/Ina_1					I2/I1 Recovery
21647304_3	Dataset C Adults	25	5					18		7.4	7.2			-100	50	-30	x	50	-30	I normalized to prepulse					I2/I1 Recovery
21647304_3	Dataset C Pediatrics	25	5					18		7.4	7.2			-100	50	-30	x	50	-30	I normalized to prepulse					I2/I1 Recovery
8928874_9	Dataset day 1	10	10					17		7.3	7.3			-140	15	-35	x	15	-35	I_2/I_1					I2/I1 Recovery
8928874_9	Dataset day 3	10	10					17		7.3	7.3			-140	15	-35	x	15	-35	I_2/I_1					I2/I1 Recovery
8928874_9	Dataset day 5	10	10					17		7.3	7.3			-140	15	-35	x	15	-35	I_2/I_1					I2/I1 Recovery
8928874_9	Dataset fresh	10	10					17		7.3	7.3			-140	15	-35	x	15	-35	I_2/I_1					I2/I1 Recovery
7971163_5	Dataset A -105	120	70					24		7.4	7.4			-135	x	-105	0	10	-20	Ina normalized to no prepulse					inactivation normalized to first
7971163_5	Dataset A -65	120	70					24		7.4	7.4			-135	x	-65	0	10	-20	Ina normalized to no prepulse					inactivation normalized to first
7971163_5	Dataset A -75	120	70					24		7.4	7.4			-135	x	-75	0	10	-20	Ina normalized to no prepulse					inactivation normalized to first
7971163_5	Dataset A -85	120	70					24		7.4	7.4			-135	x	-85	0	10	-20	Ina normalized to no prepulse					inactivation normalized to first
7971163_5	Dataset A -95	120	70					24		7.4	7.4			-135	x	-95	0	10	-20	Ina normalized to no prepulse					inactivation normalized to first
21647304_3	Dataset B Adults	25	5					18		7.4	7.2			-100	200	x	0	10	-20	I normalized to prepulse					inactivation normalized to no prepulse
21647304_3	Dataset B Pediatrics	25	5					18		7.4	7.2			-100	200	x	0	10	-20	I normalized to prepulse					inactivation normalized to no prepulse
7971163_4	Dataset 128ms	120	70					24		7.4	7.4			-135	128	x	0	10	-20	Ina normalized to -135 prepulse					inactivation normalized to no prepulse
7971163_4	Dataset 256ms	120	70					24		7.4	7.4			-135	256	x	0	10	-20	Ina normalized to -135 prepulse					inactivation normalized to no prepulse
7971163_4	Dataset 32ms	120	70					24		7.4	7.4			-135	32	x	0	10	-20	Ina normalized to -135 prepulse					inactivation normalized to no prepulse
7971163_4	Dataset 512ms	120	70					24		7.4	7.4			-135	512	x	0	10	-20	Ina normalized to -135 prepulse					inactivation normalized to no prepulse
7971163_4	Dataset 64ms	120	70					24		7.4	7.4			-135	64	x	0	10	-20	Ina normalized to -135 prepulse					inactivation normalized to no prepulse
8928874_8	Dataset C day 1	10	10					17		7.3	7.3			-140	1000	x	0	20	-35	I normalized to no prepulse					inactivation normalized to no prepulse
8928874_8	Dataset C day 3	10	10					17		7.3	7.3			-140	1000	x	0	20	-35	I normalized to no prepulse					inactivation normalized to no prepulse
8928874_8	Dataset C day 5	10	10					17		7.3	7.3			-140	1000	x	0	20	-35	I normalized to no prepulse					inactivation normalized to no prepulse
8928874_8	Dataset C fresh	10	10					17		7.3	7.3			-140	1000	x	0	20	-35	I normalized to no prepulse					inactivation normalized to no prepulse
7971163_6	Dataset -105	120	70					24		7.4	7.4			-135	200	-20	0	x	-105			0	12	-20	recovery normalized to preprepulse
7971163_6	Dataset -115	120	70					24		7.4	7.4			-135	200	-20	0	x	-115			0	12	-20	recovery normalized to preprepulse
7971163_6	Dataset -125	120	70					24		7.4	7.4			-135	200	-20	0	x	-125			0	12	-20	recovery normalized to preprepulse
7971163_6	Dataset -135	120	70					24		7.4	7.4			-135	200	-20	0	x	-135			0	12	-20	recovery normalized to preprepulse
7971163_6	Dataset -75	120	70					24		7.4	7.4			-135	200	-20	0	x	-75	Ina normalized to preprepulse		0	12	-20	recovery normalized to preprepulse
7971163_6	Dataset -85	120	70					24		7.4	7.4			-135	200	-20	0	x	-85			0	12	-20	recovery normalized to preprepulse
7971163_6	Dataset -95	120	70					24		7.4	7.4			-135	200	-20	0	x	-95			0	12	-20	recovery normalized to preprepulse
21647304_2	Dataset B Adults	25	5					18		7.4	7.2			-100	20	x				tau_act	Ina = A_1*exp(-t/tau)+A_0; holding potential could be -60				tau activation
21647304_2	Dataset B Pediactric	25	5					18		7.4	7.2			-100	20	x				tau_act					tau activation
7971163_3	Dataset C	120	70					24		7.4	7.4			-135	5	x				tau_h act	Ina = I_0*(1-exp(-t/tau_m))^3*exp(-t/tau_h)+c				tau activation
8928874_8	Dataset D day 1	10	10					17		7.3	7.3			-140	10	x				tau activation					tau activation
8928874_8	Dataset D day 3	10	10					17		7.3	7.3			-140	10	x				tau activation					tau activation
8928874_8	Dataset D day 5	10	10					17		7.3	7.3			-140	10	x				tau activation					tau activation
8928874_8	Dataset D fresh	10	10					17		7.3	7.3			-140	10	x				tau activation	Ina = A_1*exp(-t/tau)+A_0;				tau activation
1323431_5	Dataset B fast	5	5					17		7.4	7.2			-140	100	x				tau_f	Ina = A_1*exp(-t/tau_f)+A_2*exp(-t/tau_s)+A_0 , mean(-40,-20)				tau inactivation
1323431_5	Dataset B slow	5	5					17		7.4	7.2			-140	100	x				tau_s	Ina = A_1*exp(-t/tau_f)+A_2*exp(-t/tau_s)+A_0 , mean(-40,-20)				tau inactivation
21647304_2	Dataset C Adults	25	5					18		7.4	7.2			-100	100	x				tau_inact_f	Ina = A_1*exp(-t/tau_f)+A_2*exp(-t/tau_s)+A_0				tau inactivation
21647304_2	Dataset C Pediactric	25	5					18		7.4	7.2			-100	100	x				tau_inact_f					tau inactivation
21647304_2	Dataset D Adults	25	5					18		7.4	7.2			-100	100	x				tau_inact_s					tau inactivation
21647304_2	Dataset D Pediactric	25	5					18		7.4	7.2			-100	100	x				tau_inact_s					tau inactivation
8928874_8	Dataset E day 1	10	10					17		7.3	7.3			-140	100	x				tau inactivation					tau inactivation
8928874_8	Dataset E day 3	10	10					17		7.3	7.3			-140	100	x				tau inactivation					tau inactivation
8928874_8	Dataset E day 5	10	10					17		7.3	7.3			-140	100	x				tau inactivation					tau inactivation
8928874_8	Dataset E fresh	10	10					17		7.3	7.3			-140	100	x				tau inactivation	Ina = A_1*exp(-t/tau)+A_0;				tau inactivation

## Sheet: validation
pmid	name	[Na]o (mM)	[Na]I (mM)	[Ca]o (mM)	[Ca]I (mM)	[K]o (mM)	[K]I (mM)	temp ( C )	BCL (ms)	Stim Dur (ms)	Stim Val (mv)	Comment
30356673_2	Dataset B dVdt max Ctl							35	1000	1		stim 25% above threshold
26121051_5	Dataset Ad Control							36.5	1000
2112042_2	Dataset Control A							36	x	2		used fibers (0.5-1cm), 2x threshold
2112042_2	Dataset Control B							36	x	2		used fibers (0.5-1cm), 2x threshold
23341576_1	Dataset Ba Control								x			x is actually time, so they changed pacing with time
9519324_T2	Table
